# Supplementary material for: Genome Mining and Characterization of Landfill-Derived Bacillus pretiosus Reveals Biosynthetic Gene Clusters and Candidate Plastic-Degrading Genes
Source: Research Square preprint supplement (doi:10.21203/rs.3.rs-7818688/v1), 2025-10-27
Supplement: Supplementary file 1 [file 23f14ac9e3e3694f137bc3e8.docx]

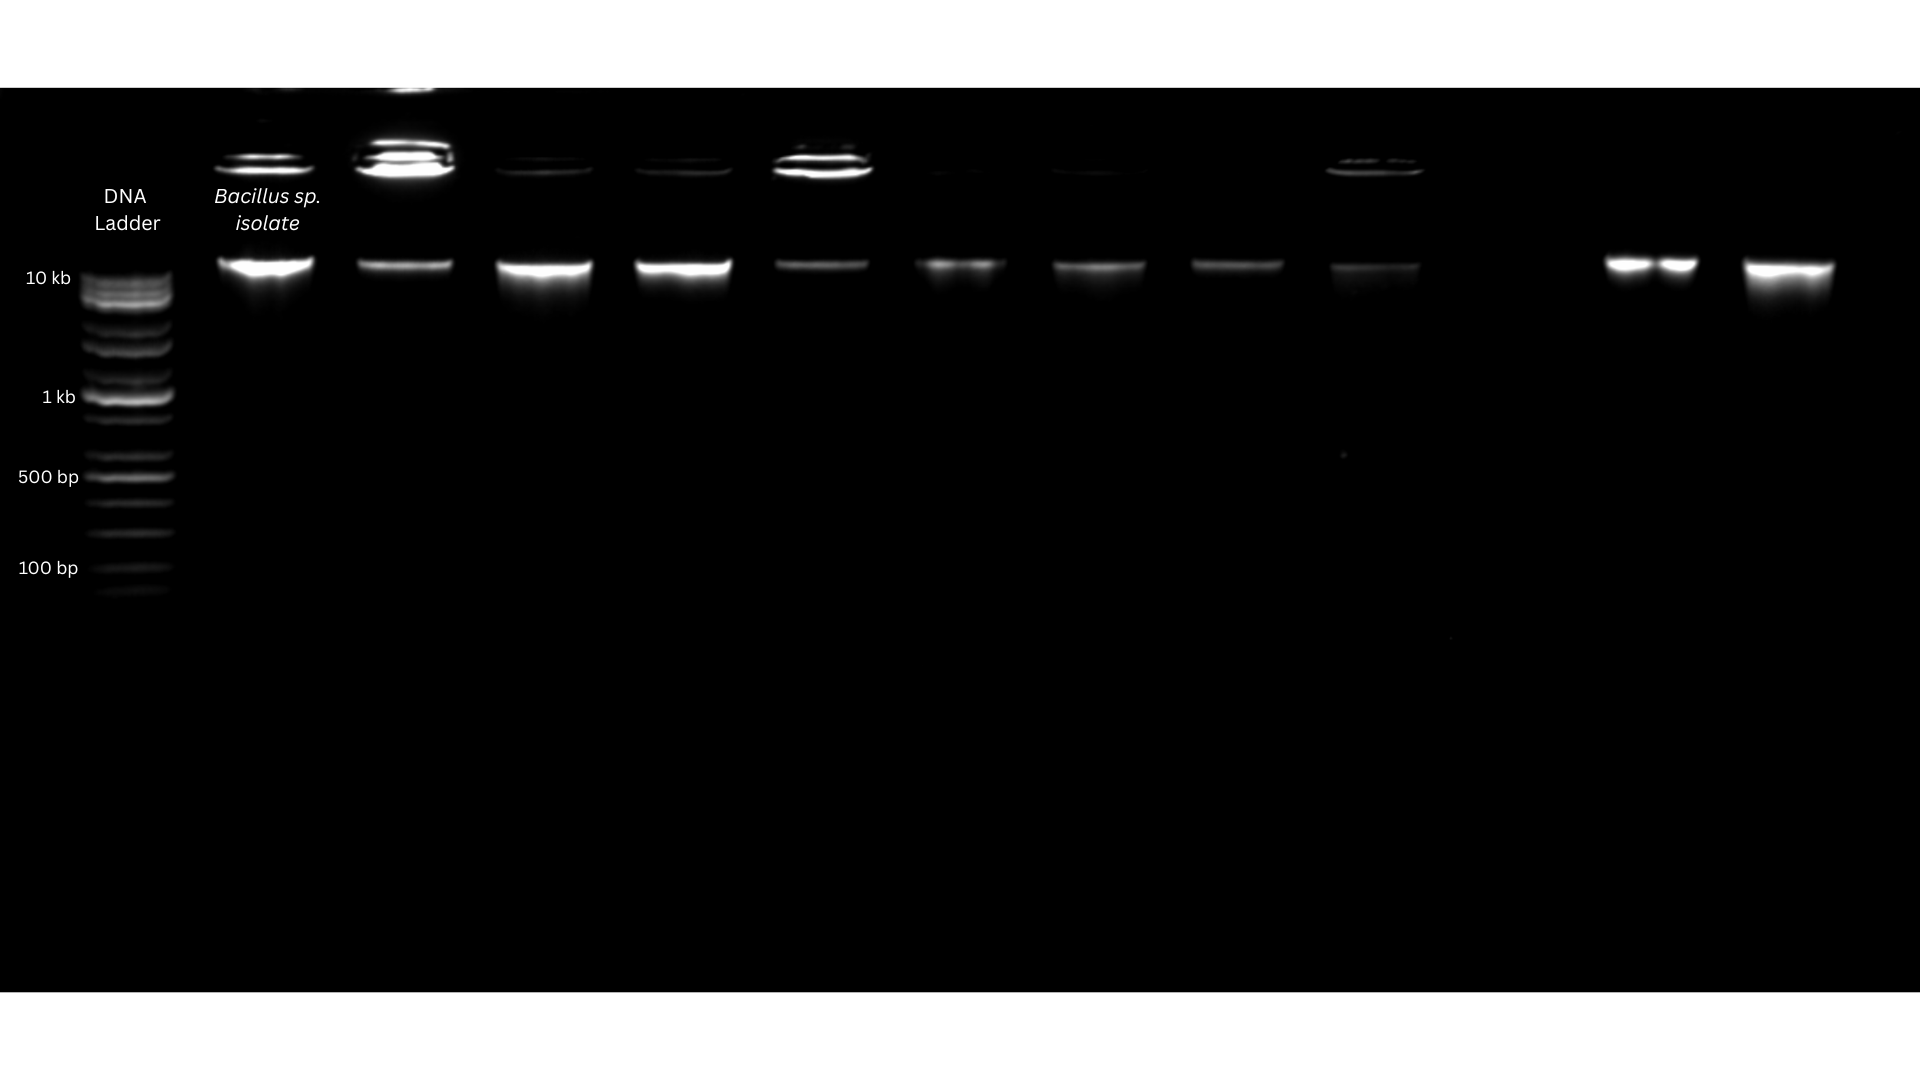


**Supplementary Figure 2.** Results of genomic DNA Extraction of *Bacillus sp. isolate* run on agarose gel electrophoresis using 1.2% VivantisTM agarose, 0.5 ul Sigma AldrichTM Ethidium bromide and 40 mL of 1X TBE Buffer. Vivantis 1kb Plus ladder was used as reference for the DNA sizes. A volume of 2 ul Vivantis Loading dye and 3 ul DNA sample was loaded on the agarose wells for 30 minutes at 100 volts using MupidOneTM gel electrophoresissystem.
