# Supplementary material for: Genome Mining and Characterization of Landfill-Derived Bacillus pretiosus Reveals Biosynthetic Gene Clusters and Candidate Plastic-Degrading Genes
Source: Research Square preprint supplement (doi:10.21203/rs.3.rs-7818688/v1), 2025-10-27
Supplement: Supplementary file 2 [file de190469dbde3301202501fb.docx]

**Supplementary Figure 1.** Bar plots showing the percent degradation (through weight reduction; light blue bars) of LDPE plastics after 60 days of incubation with a the different microbial isolates. The values represent the mean percent (%) degradation with error bars indicating standard deviation of the replicates for each treatment.
